# Supplementary material for: Fabrication of uniform layer-by-layer assemblies with complementary protein cage nanobuilding blocks via simple His-tag/metal recognition
Source: Royal Society of Chemistry journal article supplement (doi:10.1039/c3tb20554a), 2013-01-01
Supplement: c3tb20554a.pdf [file c3tb20554a.pdf]

Supporting information for

**Fabrication of uniform layer-by-layer assemblies with complementary protein cage nanobuilding blocks via simple His-tag/metal recognition**

Hyojin Moon, Woo Gyum Kim, Seongdong Lim, Young Ji Kang, Hyun-Hee Shin, Hyunhyub Ko, Sung You Hong, and Sebyung Kang\*

**Supporting Figure 1**

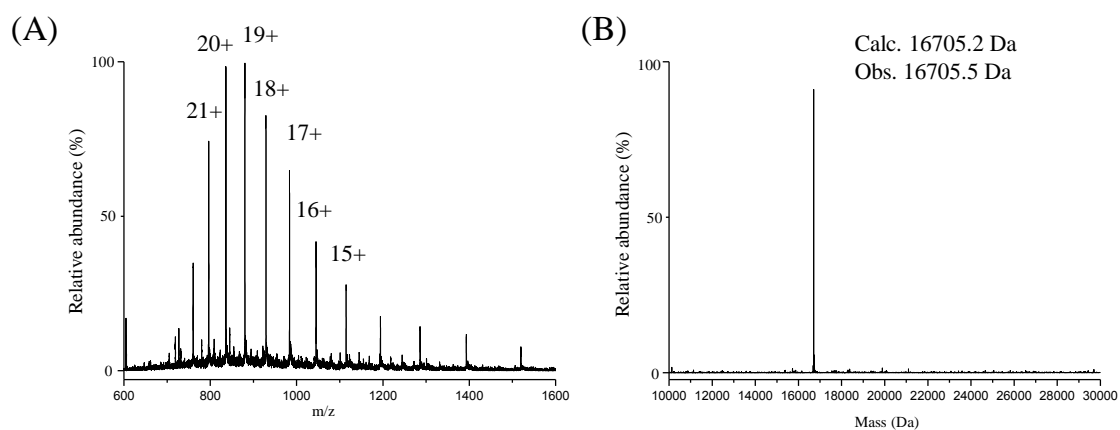

**Supporting Figure 1.** ESI-TOF mass spectrum of the dissociated subunits of wt AaLS PCN. (A) Gaussian charge state distribution is shown and a series of charged peaks is indicated (15+ to 21+). (B) Deconvoluted molecular mass of the dissociated subunits of wt AaLS PCN (calculated, 16705.2 Da; observed, 16705.5 Da).

## Supporting Figure 2

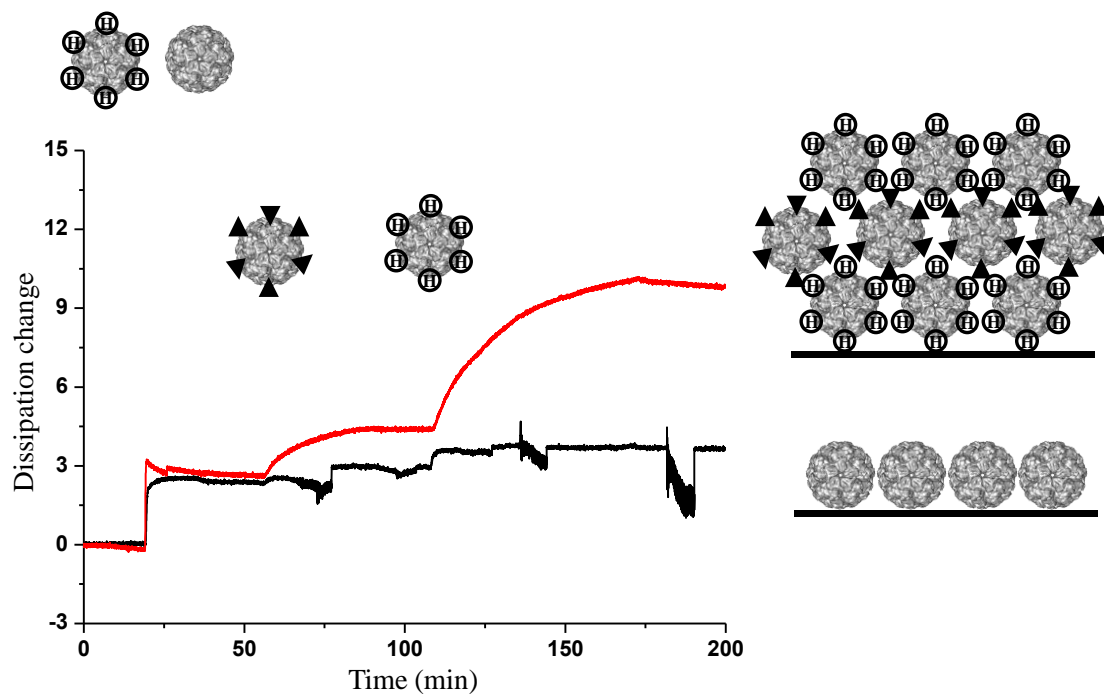

**Supporting Figure 2.** QCM dissipation change ( $\Delta D$ ) profiles of either wt AaLS (black line) or AaLS-His<sub>6</sub> (red line) PCNs on the QCM sensors and subsequent deposition of AaLS-NTA-Ni on the monolayer of AaLS-His<sub>6</sub>. While the dissipation of AaLS-His<sub>6</sub> PCN monolayered QCM sensor increased dramatically upon introduction of AaLS-NTA-Ni PCNs (red line), the dissipation of wt AaLS PCN monolayered QCM sensor remained unchanged (black line).

### Supporting Figure 3

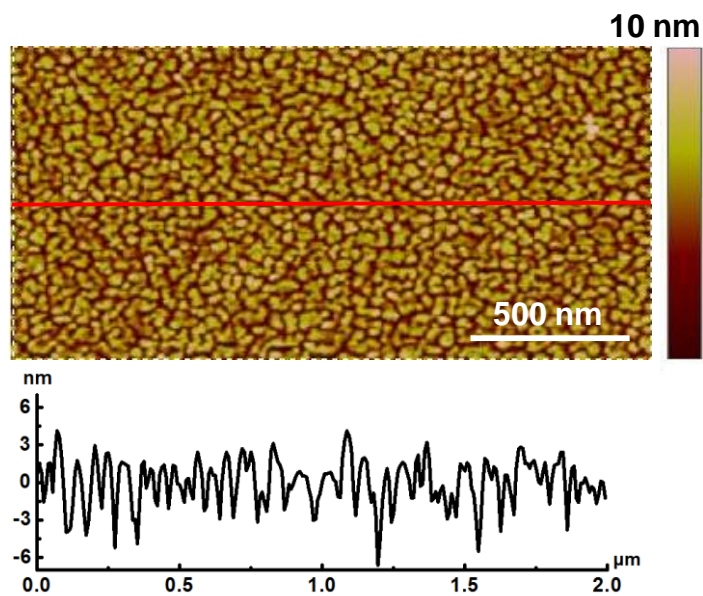

**Supporting Figure 3.** Atomic force microscopic (AFM) image of basic gold film for the LbL assemblies. Surface roughness is 1.94 nm.
